# Supplementary material for: Intravitreal Aflibercept for the Treatment of Diabetic Macular Edema in Routine Clinical Practice: Results from the 24-Month AURIGA Observational Study
Source: PubMed Central journal article supplement — Ophthalmol Ther. 2023 Nov 4;13(1):161–78. doi: 10.1007/s40123-023-00829-3 (PMC10776528; doi:10.1007/s40123-023-00829-3), 2023-11-04
Supplement: 40123_2023_829_MOESM1_ESM.pdf [file 40123_2023_829_MOESM1_ESM.pdf]

## SUPPLEMENTARY MATERIALS

### **Intravitreal Aflibercept for the Treatment of Diabetic Macular Edema in Routine Clinical Practice: Results from the 24-Month AURIGA Observational Study**

Simone Donati,<sup>1\*</sup> Chang-Hao Yang,<sup>2</sup> Xun Xu,<sup>3</sup> Marco Mura,<sup>4</sup> Audrey Giocanti-Aurégan,<sup>5</sup>  
Hans Hoerauf,<sup>6</sup> Helmut Allmeier,<sup>7</sup> Tobias Machewitz,<sup>8</sup> Kristian T. Johnson,<sup>9</sup> Elina Santoro,<sup>10</sup>  
on behalf of the AURIGA study investigators

<sup>1</sup>Department of Medicine and Surgery, University of Insubria, Varese, Italy

<sup>2</sup>Department of Ophthalmology, National Taiwan University Hospital, Taipei, Taiwan; College  
of Medicine, National Taiwan University, Taipei, Taiwan

<sup>3</sup>Department of Ophthalmology, Shanghai General Hospital, Shanghai, China

<sup>4</sup>King Khaled Eye Specialist Hospital, Riyadh, Saudi Arabia

<sup>5</sup>Hôpital Avicenne, Sorbonne Paris Nord University, Bobigny, France

<sup>6</sup>Augenlinik, Universitätsmedizin Göttingen, Göttingen, Germany

<sup>7</sup>Bayer Consumer Care AG, Basel, Switzerland

<sup>8</sup>Bayer AG, Berlin, Germany

<sup>9</sup>Bayer U.S. LLC, Cambridge, MA, USA

<sup>10</sup>Surgut Regional Clinical Hospital, Surgut, Russia

**\*Corresponding author:**

Prof. Simone Donati

Department of Medicine and Surgery

University of Insubria

Via Guicciardini 9

21100 Varese, Italy

Email: [simone.donati@uninsubria.it](mailto:simone.donati@uninsubria.it)

## **Supplementary Methods**

### **Sample size**

The sample size justification for the AURIGA diabetic macular edema (DME) treatment cohorts used a two-sided 95% confidence interval (CI) of  $\pm 1.72$  letters to enable sufficient precision in the assessment of the mean change in visual acuity (VA) from baseline to Month 12 (primary endpoint) by country and by cohort. This calculation incorporated a conservative standard deviation (SD) estimate of 13 letters for the change in VA from baseline based on POLARIS, an observational study of ranibizumab in patients with DME [1, 2]. Assuming a drop-out rate of 20%,  $\geq 275$  patients each with treatment-naïve and pretreated DME needed to be enrolled in each of the participating countries to achieve sufficient precision for a by-country analysis (calculated using nQuery v.7.0; Statistical Solutions Ltd., Cork, Ireland). Based on the countries' level of interest in these cohorts, the AURIGA study aimed to enroll treatment-naïve patients from all countries/regions participating in the study (France, Germany, Italy, Mainland China, Middle East, Russia, and Taiwan; where the Middle East countries consisted of Egypt, Kuwait, Lebanon, Saudi Arabia, and the United Arab Emirates), and pretreated patients from Italy, Mainland China, and Russia. This resulted in an overall planned enrollment of 1925 and 825 patients with treatment-naïve and pretreated DME, respectively.

### **Exclusion criteria**

Exclusion criteria included: any contraindications listed in the local intravitreal aflibercept (IVT-AFL) Summary of Product Characteristics (SmPC); concomitant therapy with a systemic anti-vascular endothelial growth factor (anti-VEGF) or pro-VEGF agent; concomitant therapy with any other agent for the treatment of DME in the study eye; structural damage to the center of the macula in either eye that is likely to preclude improvement in VA following the resolution of macular edema, or any other condition expected to permanently limit VA outcomes over the course of the study; patients with prior retinal surgery; laser photocoagulation (pan-retinal or macular) in the study eye within 90 days of Day 1; and a history of stroke or transient ischemic attacks within the last 6 months. In the pretreated cohort, only patients who had received prior treatment with steroids or intravitreal anti-VEGF agents other than IVT-AFL were eligible for enrollment. Additional exclusion criteria applied to pretreated patients were prior treatment with laser, anti-angiogenic drugs, ocular surgery, or intravitreal dexamethasone or triamcinolone within the last 3 months; a dexamethasone implant within the last 6 months; or a fluocinolone implant within the last 3 years.

## **COVID-19 sensitivity analysis**

The date by which  $\geq 100$  confirmed Coronavirus Disease 2019 (COVID-19) cases were reported in a country was considered to be its COVID-19 start date. The COVID-19 start dates for each country reporting DME data were: China, January 22; France, February 29; Germany, March 1; Italy, February 23; Russia, March 13; and Taiwan, March 18 (all in 2020). In the 4 participating countries in the Middle East, the COVID-19 start date ranged from March 14 to March 18, and a start date of March 14 was applied to the pooled analysis of data from this region.

**Supplementary Table 1** Reasons for switch to IVT-AFL treatment in the pretreated cohort

|                                                    | <b>Italy<br/>pretreated<br/>(n=75)</b> | <b>Russia<br/>pretreated<br/>(n=276)</b> | <b>Mainland China<br/>pretreated<br/>(n=33)</b> | <b>Overall DME<br/>pretreated<br/>(N=384)</b> |
|----------------------------------------------------|----------------------------------------|------------------------------------------|-------------------------------------------------|-----------------------------------------------|
| <b>Effort to extend treatment interval</b>         | 0                                      | 2 (0.7)                                  | 2 (6.1)                                         | 4 (1.0)                                       |
| <b>Persistent intraretinal or subretinal fluid</b> | 38 (50.7)                              | 209 (75.7)                               | 1 (3.0)                                         | 248 (64.6)                                    |
| <b>Recurrence of fluid</b>                         | 32 (42.7)                              | 40 (14.5)                                | 3 (9.1)                                         | 75 (19.5)                                     |
| <b>New hemorrhage</b>                              | 0                                      | 1 (0.4)                                  | 3 (9.1)                                         | 4 (1.0)                                       |
| <b>Decreased vision</b>                            | 0                                      | 12 (4.3)                                 | 9 (27.3)                                        | 21 (5.5)                                      |
| <b>Lack of compliance</b>                          | 0                                      | 5 (1.8)                                  | 0                                               | 5 (1.3)                                       |
| <b>Patient request</b>                             | 2 (2.7)                                | 7 (2.5)                                  | 9 (27.3)                                        | 18 (4.7)                                      |
| <b>Other</b>                                       | 2 (2.7)                                | 0                                        | 6 (18.2)                                        | 8 (2.1)                                       |
| <b>Missing</b>                                     | 1 (1.3)                                | 0                                        | 0                                               | 1 (0.3)                                       |

Values are n, %. DME, diabetic macular edema; IVT-AFL, intravitreal aflibercept.

**Supplementary Table 2** Time (months) to treatment initiation per country

| <b>Treatment-naïve cohort</b>                                  | <b>France<br/>(n=164)</b> | <b>Germany<br/>(n=150)</b> | <b>Italy<br/>(n=207)</b>             | <b>Russia<br/>(n=280)</b>             | <b>Middle East<br/>(n=203)</b> | <b>Taiwan<br/>(n=267)</b> | <b>Mainland<br/>China<br/>(n=207)</b> | <b>Overall<br/>cohort<br/>(N=1478)</b> |
|----------------------------------------------------------------|---------------------------|----------------------------|--------------------------------------|---------------------------------------|--------------------------------|---------------------------|---------------------------------------|----------------------------------------|
| <b>Time from symptom occurrence to first IVT-AFL injection</b> | 7.9±15.0                  | 5.2±19.5                   | 25.2±58.8                            | 17.3±24.3                             | 13.4±39.3                      | 9.7±28.8                  | 6.6±10.5                              | 12.7±32.8                              |
| <b>Time from DME diagnosis to first IVT-AFL injection</b>      | 5.9±13.6                  | 4.4±19.4                   | 21.9±57.0                            | 10.1±17.6                             | 8.7±35.1                       | 7.6±25.1                  | 2.4±6.9                               | 9.0±29.8                               |
| <b>Time from decision-to-treat to first IVT-AFL injection</b>  | 0.4±0.7                   | 0.5±0.5                    | 0.8±0.9                              | 0.5±1.3                               | 0.6±1.6                        | 0.7±1.2                   | 0.1±0.2                               | 0.5±1.1                                |
| <b>Pretreated cohort</b>                                       | <b>Italy<br/>(n=75)</b>   | <b>Russia<br/>(n=276)</b>  | <b>Mainland<br/>China<br/>(n=33)</b> | <b>Overall<br/>cohort<br/>(N=384)</b> |                                |                           |                                       |                                        |
| <b>Time from symptom occurrence to first IVT-AFL injection</b> | 44.6±57.0                 | 29.3±23.5                  | 22.1±32.1                            | 31.6±33.8                             |                                |                           |                                       |                                        |
| <b>Time from DME diagnosis to first IVT-AFL injection</b>      | 40.0±55.8                 | 21.9±19.8                  | 15.3±25.4                            | 24.8±31.5                             |                                |                           |                                       |                                        |
| <b>Time from decision-to-treat to first IVT-AFL injection</b>  | 0.7±0.7                   | 1.2±2.3                    | 0.1±0.1                              | 1.0±2.0                               |                                |                           |                                       |                                        |

Values are mean±SD. DME, diabetic macular edema; IVT-AFL, intravitreal aflibercept; SD, standard deviation.

**Supplementary Table 3** Baseline visual acuity and central retinal thickness in each cohort, by country

|                             | Treatment-naïve<br>(n=1478) | Pretreated<br>(n=384) |
|-----------------------------|-----------------------------|-----------------------|
| <b>Baseline VA, letters</b> |                             |                       |
| France                      | 67.1±10.6                   |                       |
| n                           | 145                         |                       |
| Germany                     | 65.0±15.3                   |                       |
| n                           | 142                         |                       |
| Italy                       | 54.5±21.0                   | 58.3±18.9             |
| n                           | 200                         | 73                    |
| Russia                      | 54.2±19.2                   | 48.7±19.4             |
| n                           | 280                         | 275                   |
| Middle East                 | 61.2±19.5                   |                       |
| n                           | 191                         |                       |
| Taiwan                      | 49.7±19.6                   |                       |
| n                           | 258                         |                       |
| Mainland China              | 48.5±20.8                   | 52.5±18.2             |
| n                           | 195                         | 30                    |
| <b>Total</b>                | <b>56.0±19.8</b>            | <b>50.8±19.5</b>      |
| <b>N</b>                    | <b>1411</b>                 | <b>378</b>            |
| <b>Baseline CRT, µm</b>     |                             |                       |
| France                      | 453±128                     |                       |
| n                           | 149                         |                       |
| Germany                     | 391±132                     |                       |
| n                           | 116                         |                       |
| Italy                       | 457±116                     | 448±115               |
| n                           | 172                         | 63                    |
| Russia                      | 443±132                     | 470±155               |
| n                           | 275                         | 271                   |
| Middle East                 | 403±131                     |                       |
| n                           | 178                         |                       |
| Taiwan                      | 433±120                     |                       |
| n                           | 265                         |                       |
| Mainland China              | 474±216                     | 454±143               |
| n                           | 137                         | 26                    |
| <b>Total</b>                | <b>437 ±140</b>             | <b>465 ±148</b>       |
| <b>N</b>                    | <b>1292</b>                 | <b>360</b>            |

Data are mean±SD unless otherwise stated. CRT, central retinal thickness; SD, standard deviation; VA, visual acuity.

**Supplementary Table 4** Mean change in visual acuity (letters) from baseline to Month 12 stratified by gender

|                                   | <b>Female<br/>treatment-naïve<br/>(n=723)</b> | <b>Male<br/>treatment-naïve<br/>(n=751)</b> | <b>Overall DME<br/>treatment-naïve<br/>(N=1478)<sup>a</sup></b> | <b>Female<br/>pretreated<br/>(n=222)</b> | <b>Male<br/>pretreated<br/>(n=162)</b> | <b>Overall DME<br/>pretreated<br/>(N=384)</b> |
|-----------------------------------|-----------------------------------------------|---------------------------------------------|-----------------------------------------------------------------|------------------------------------------|----------------------------------------|-----------------------------------------------|
| <b>Baseline</b>                   |                                               |                                             |                                                                 |                                          |                                        |                                               |
| Mean VA                           | 54.4±20.4                                     | 57.5±19.1                                   | 56.0±19.8                                                       | 48.7±19.5                                | 53.8±19.2                              | 50.8±19.5                                     |
| n, %                              | 695 (96.1)                                    | 712 (94.8)                                  | 1411 (95.5)                                                     | 221 (99.5)                               | 157 (96.9)                             | 378 (98.4)                                    |
| <b>Change from BL to Month 12</b> |                                               |                                             |                                                                 |                                          |                                        |                                               |
| Mean (95% CI)                     | 6.0 (4.7, 7.3)                                | 7.3 (6.0, 8.7)                              | 6.7 (5.7, 7.6)                                                  | 7.9 (5.5, 10.3)                          | 6.8 (3.6, 10.0)                        | 7.4 (5.5, 9.4)                                |
| n, %                              | 632 (87.4)                                    | 637 (84.8)                                  | 1273 (86.1)                                                     | 214 (96.4)                               | 144 (88.9)                             | 358 (93.2)                                    |

Data are from the FAS (LOCF) and values are mean±SD unless otherwise stated. The mean VA change data are based on the nearest VA assessment within the ±60-day visit window at Month 12.

<sup>a</sup>Four treatment-naïve patients had missing gender data in the Middle East cohort. BL, baseline; CI, confidence interval; DME, diabetic macular edema; FAS, full analysis set; LOCF, last observation carried forward; SD, standard deviation; VA, visual acuity.

**Supplementary Table 5** Change in visual acuity (letters) from baseline to Months 6, 12, and 24 in each country and the overall treatment cohorts

|                                 | France    | Germany   | Italy     | Russia    | Middle East | Taiwan    | Mainland China | Total     |
|---------------------------------|-----------|-----------|-----------|-----------|-------------|-----------|----------------|-----------|
| <b>Treatment-naïve (n=1478)</b> |           |           |           |           |             |           |                |           |
| <b>BL</b>                       |           |           |           |           |             |           |                |           |
| Mean VA                         | 67.1±10.6 | 65.0±15.3 | 54.5±21.0 | 54.2±19.2 | 61.2±19.5   | 49.7±19.6 | 48.5±20.8      | 56.0±19.8 |
| n                               | 145       | 142       | 200       | 280       | 191         | 258       | 195            | 1411      |
| <b>Month 6</b>                  |           |           |           |           |             |           |                |           |
| Mean VA                         | 72.8±12.3 | 69.8±14.0 | 61.2±20.8 | 62.3±17.3 | 66.9±14.9   | 59.2±17.7 | 57.0±19.1      | 63.5±17.7 |
| n                               | 149       | 145       | 157       | 270       | 154         | 252       | 159            | 1286      |
| Change from BL                  | 6.1±11.6  | 4.6±11.4  | 5.8±17.4  | 8.0±12.7  | 7.3±17.7    | 9.5±18.8  | 7.5±19.4       | 7.3±16.0  |
| 95% CI                          | 4.1, 8.1  | 2.6, 6.5  | 3.1, 8.6  | 6.5, 9.5  | 4.4, 10.2   | 7.1, 11.8 | 4.4, 10.6      | 6.4, 8.2  |
| n                               | 133       | 137       | 153       | 270       | 145         | 244       | 152            | 1234      |
| <b>Month 12</b>                 |           |           |           |           |             |           |                |           |
| Mean VA                         | 72.9±11.4 | 69.3±16.1 | 61.2±19.8 | 60.8±17.8 | 67.2±15.6   | 58.2±19.6 | 56.1±20.8      | 62.9±18.6 |
| n                               | 151       | 146       | 181       | 270       | 164         | 255       | 160            | 1327      |
| Change from BL                  | 5.9±10.7  | 4.0±11.4  | 6.3±19.3  | 6.5±13.6  | 8.0±18.9    | 8.4±20.9  | 6.4±21.7       | 6.7±17.4  |
| 95% CI                          | 4.1, 7.8  | 2.1, 5.9  | 3.4, 9.1  | 4.9, 8.1  | 5.0, 11.0   | 5.8, 11.0 | 2.9, 9.9       | 5.7, 7.6  |
| n                               | 133       | 138       | 177       | 270       | 155         | 247       | 153            | 1273      |
| <b>Month 24</b>                 |           |           |           |           |             |           |                |           |
| Mean VA                         | 72.6±11.0 | 70.3±16.1 | 60.0±20.8 | 58.9±18.5 | 65.8±17.4   | 57.6±20.4 | 56.0±20.7      | 62.1±19.2 |
| n                               | 152       | 146       | 182       | 270       | 170         | 256       | 160            | 1336      |
| Change from BL                  | 5.5±10.4  | 5.0±11.7  | 5.0±21.6  | 4.6±14.6  | 6.1±20.5    | 8.1±20.7  | 6.3±21.8       | 5.9±18.1  |
| 95% CI                          | 3.7, 7.3  | 3.0, 6.9  | 1.8, 8.2  | 2.9, 6.4  | 2.9, 9.3    | 5.5, 10.7 | 2.8, 9.7       | 4.9, 6.9  |
| n                               | 134       | 138       | 178       | 270       | 160         | 248       | 153            | 1281      |
| <b>Pretreated (n=384)</b>       |           |           |           |           |             |           |                |           |
| <b>BL</b>                       |           |           |           |           |             |           |                |           |
| Mean VA                         |           |           | 58.3±18.9 | 48.7±19.4 |             |           | 52.5±18.2      | 50.8±19.5 |
| n                               |           |           | 73        | 275       |             |           | 30             | 378       |
| <b>Month 6</b>                  |           |           |           |           |             |           |                |           |
| Mean VA                         |           |           | 62.8±15.8 | 59.1±18.5 |             |           | 49.6±20.5      | 59.1±18.4 |
| n                               |           |           | 64        | 265       |             |           | 24             | 353       |
| Change from BL                  |           |           | 5.5±13.9  | 10.7±17.8 |             |           | -6.1±22.3      | 8.7±17.9  |
| 95% CI                          |           |           | 1.9, 9.0  | 8.5, 12.8 |             |           | -16.0, 3.8     | 6.8, 10.6 |
| n                               |           |           | 62        | 264       |             |           | 22             | 348       |



|                 |  |           |           |  |           |           |
|-----------------|--|-----------|-----------|--|-----------|-----------|
| <b>Month 12</b> |  |           |           |  |           |           |
| Mean VA         |  | 61.1±18.6 | 57.6±20.0 |  | 52.0±19.9 | 57.9±19.8 |
| n               |  | 70        | 268       |  | 25        | 363       |
| Change from BL  |  | 3.8±14.8  | 9.1±19.0  |  | -1.3±18.7 | 7.4±18.5  |
| 95% CI          |  | 0.2, 7.4  | 6.8, 11.4 |  | -9.4, 6.7 | 5.5, 9.4  |
| n               |  | 68        | 267       |  | 23        | 358       |
| <b>Month 24</b> |  |           |           |  |           |           |
| Mean VA         |  | 60.8±18.6 | 58.6±20.3 |  | 52.0±19.9 | 58.6±20.0 |
| n               |  | 71        | 269       |  | 25        | 365       |
| Change from BL  |  | 3.5±17.1  | 10.1±20.0 |  | -1.3±18.7 | 8.1±19.7  |
| 95% CI          |  | -0.6, 7.6 | 7.7, 12.5 |  | -9.4, 6.7 | 6.1, 10.1 |
| n               |  | 69        | 268       |  | 23        | 360       |

Data are mean ± SD unless otherwise stated. The mean VA change data are based on the nearest VA assessment within the ±30-day visit window at 6 months and within the ±60-day visit window at Months 12 and 24. BL, baseline; SD, standard deviation; VA, visual acuity.

**Supplementary Table 6** Mean number of intravitreal aflibercept treatments for each country

|                             | Treatment-naïve<br>(n=1478) | Pretreated<br>(n=384) |
|-----------------------------|-----------------------------|-----------------------|
| <b>Until Month 6 visit</b>  |                             |                       |
| France                      | 5.0±1.4                     |                       |
| Germany                     | 5.0±1.6                     |                       |
| Italy                       | 4.1±1.4                     | 4.3±1.2               |
| Russia                      | 4.4±1.5                     | 4.1±1.5               |
| Middle East                 | 2.7±1.5                     |                       |
| Taiwan                      | 4.0±1.5                     |                       |
| China                       | 2.0±1.1                     | 1.9±1.0               |
| <b>Total</b>                | <b>3.8±1.7</b>              | <b>3.9±1.5</b>        |
| <b>Until Month 12 visit</b> |                             |                       |
| France                      | 6.6±2.6                     |                       |
| Germany                     | 7.1±3.2                     |                       |
| Italy                       | 5.0±2.0                     | 5.4±1.9               |
| Russia                      | 5.7±2.5                     | 5.1±2.4               |
| Middle East                 | 3.4±2.2                     |                       |
| Taiwan                      | 5.1±2.4                     |                       |
| China                       | 2.1±1.2                     | 2.1±1.2               |
| <b>Total</b>                | <b>4.9±2.8</b>              | <b>4.9±2.4</b>        |
| <b>Until Month 24 visit</b> |                             |                       |
| France                      | 7.8±4.0                     |                       |
| Germany                     | 9.0±5.3                     |                       |
| Italy                       | 5.6±2.7                     | 6.2±2.8               |
| Russia                      | 7.0±3.9                     | 6.6±3.7               |
| Middle East                 | 4.0±2.8                     |                       |
| Taiwan                      | 5.6±2.9                     |                       |
| China                       | 2.1±1.2                     | 2.1±1.2               |
| <b>Total</b>                | <b>5.7±3.9</b>              | <b>6.2±3.6</b>        |

Data are mean ± SD. SD, standard deviation.

**Supplementary Figure 1** Letter gains and losses from baseline to Month 24 in treatment-naïve and pretreated patients with diabetic macular edema following intravitreal aflibercept treatment

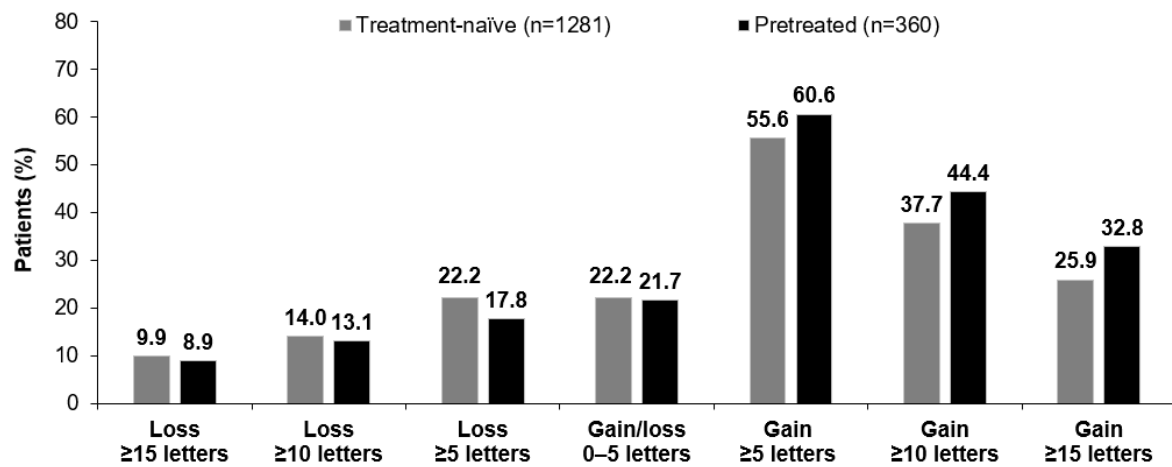

## References

1. Stefanickova J, Cunha-Vaz J, Ulbig M, Pearce I, Fernández-Vega Sanz A, Theodossiadis P, et al. A noninterventional study to monitor patients with diabetic macular oedema starting treatment with ranibizumab (POLARIS). *Acta Ophthalmol.* 2018;96(8):e942-e9.
2. Ulbig M, Höh H, Schmickler S, Wolf A, Dimopoulos S, Lorenz K, et al. [Treatment reality with ranibizumab in clinical routine use for patients with diabetic macular edema: 1-year results of the German POLARIS cohort]. *Ophthalmologe.* 2019;116(7):631-9.

## Appendix I: AURIGA ethics approval committees

| Name of Institutional Ethics Committee (IEC)/Institutional Review Board (IRB)                           | Approval number                |
|---------------------------------------------------------------------------------------------------------|--------------------------------|
| <b>SAUDI ARABIA</b>                                                                                     |                                |
| King Faisal Specialist Hospital & Research Center - Jeddah IRB                                          | RC-J/381/39                    |
| King Faisal Specialist Hospital & Research Center - Riyadh IRB                                          | C380/541/39                    |
| King Khaled Eye Specialist Hospital IRB                                                                 | RD/2600/6557-18                |
| King Saud University Medical City IRB                                                                   | 18/0201/IRB                    |
| King Abdullah International Medical Research Center IRB (study site: King Fahd National Guard Hospital) | IRBC/1559/19                   |
| <b>TAIWAN</b>                                                                                           |                                |
| Taipei Veterans General Hospital IRB                                                                    | 2018-06-016CCU                 |
| Shin Kong Wu Ho-Su Memorial Hospital IRB                                                                | 20180902C                      |
| Chi Mei Medical Center IRB                                                                              | 10711-004                      |
| National Taiwan University Hospital Research Ethics Committee                                           | 201808068RSC                   |
| Mackay Memorial Hospital IRB                                                                            | 18CT035be                      |
| Changhua Christian Hospital IRB                                                                         | 180817                         |
| China Medical University Hospital Research Ethics Committee                                             | CMUH107-REC1-134               |
| Kaohsiung Veterans General Hospital IRB                                                                 | VGHKS18-CT10-06                |
| Kaohsiung Medical University Hospital IRB                                                               | KMUHIRB-F(II)-20180137         |
| National Cheng Kung University Hospital IRB                                                             | AB-CR-107-053                  |
| Tri-Service General Hospital IRB                                                                        | 2-108-01-015                   |
| Hualien Tzu Chi Hospital, Buddhist Tzu Chi Medical Foundation Research Ethics Committee                 | IRB109-050-B                   |
| Taipei Municipal Wan Fang Hospital IRB                                                                  | N202003042                     |
| Far Eastern Memorial Hospital Research Ethics Review Committee                                          | 109077-F                       |
| <b>CHINA</b>                                                                                            |                                |
| Jinan Second People's Hospital IRB                                                                      | Ji lun shen No. 2019-03        |
| Weifang Eye Hospital IRB                                                                                | Yuan Lun Kuai No.[2019]01      |
| Shanghai General Hospital IRB                                                                           | Yuan Lun Kuai No.[2019]43      |
| Beijing Aier Intech Eye Hospital IRB                                                                    | BJAIER2019IRB02                |
| Medical Ethics Committee of the First Affiliated Hospital of Jinan University                           | [2019]Lun Shen Pi Ke No.030    |
| Aier Eye Hospital IRB                                                                                   | GZAIER2019IRB11                |
| Medical Ethics Committee of Tianjin Eye Hospital                                                        | Research Review No.201901      |
| Medical Ethics Committee of Eye & Ent Hospital of Fudan University                                      | [2019]Lun Shen Zi No.(2019049) |

|                                                                                                                                  |                                      |
|----------------------------------------------------------------------------------------------------------------------------------|--------------------------------------|
| The Affiliated Eye Hospital of Shandong University of Traditional Chinese Medicine Medical Ethics Committee                      | SDTCMAEHEC2019-01                    |
| Medical Ethics Committee of Henan Eye Hospital                                                                                   | HNEECKY-2019(7)                      |
| The First Affiliated Hospital of Guangzhou University of Chinese Medicine Ethics Committee                                       | No. ZYYEC2019-018-JT                 |
| Ethics Committee of Shenzhen Eyes Hospital                                                                                       | Shen Eye Lun Shen No. 20190701-01    |
| Medical Ethics Committee of Tianjin Medical University Eye Hospital                                                              | 2019KY-11                            |
| Medical Ethics Committee of Shandong Eye Institute                                                                               | Qing Yan Lun Shen (Kuai) No.[2019]01 |
| The First Affiliated Hospital of Zhengzhou University Scientific Research and Clinical Trial Ethics Committee                    | Drug-2019-079                        |
| Medical Ethics Committee of Joint Shantou International Eye Center of Shantou University and The Chinese University of Hong Kong | EC 20190911(4)-P04                   |
| Shanxi Eye Hospital Drug Clinical Trial IRB                                                                                      | SXEH2019IRB02                        |
| Xuzhou No.1 People's Hospital Medical Ethics Committee                                                                           | xyll[2019]22                         |
| IRB of Beijing Hospital                                                                                                          | 2019BJYYEC-107-01                    |
| Ethics Review Committee of Peking Union Medical College Hospital                                                                 | B314                                 |
| Ethics Committee of Xinhua Hospital Affiliated to Shanghai Jiaotong University School of Medicine                                | XHEC-C-2019-022-2                    |

## FRANCE

|                                                                                                                       |                  |
|-----------------------------------------------------------------------------------------------------------------------|------------------|
| All sites in France were approved by a central ethics committee: Comite de Protection des Personnes Ile de France III | Ref.CPP: 3551-NI |
|-----------------------------------------------------------------------------------------------------------------------|------------------|

## GERMANY

|                                                                                                                             |                                  |
|-----------------------------------------------------------------------------------------------------------------------------|----------------------------------|
| Ethikkommission der Technischen Universität München                                                                         | 252/17S                          |
| Ärzttekammer Nordrhein                                                                                                      | 2017386                          |
| Ethikkommission der Otto-von Guericke-Universität an der Medizinischen Fakultät und am Universitätsklinikum Magdeburg A.ö.R | 174/17                           |
| Sächsische Landesärztekammer Ethikkommission                                                                                | EK-BR-83/17-1                    |
| Ärzttekammer Hamburg                                                                                                        | MC-387/17                        |
| Ethikkommission an der Med. Fakultät der HHU Düsseldorf                                                                     | Ihre Registrierungsnummer: 6250R |
| Ethikkommission an der Universitätsmedizin Greifswald                                                                       | BB 049/18                        |
| Ethikkommission der Universität zu Lübeck                                                                                   | 18-093                           |
| Ethikkommission an der Medizinischen Fakultät der Universität Leipzig                                                       | 133/18-lk                        |
| Ethikkommission der Universitätsmedizin Göttingen                                                                           | 12/5/18                          |
| Ethikkommission der Landesärztekammer Rheinland Pfalz                                                                       | 2018 - 13331                     |
| Ethik-Kommission der Albert-Ludwigs-Universität Freiburg                                                                    | 308/18                           |
| Ethikkommission der Medizinischen Fakultät Heidelberg                                                                       | S-224/2019                       |
| Ethik-Kommission des Fachbereichs Medizin der Johann Wolfgang Goethe-Universität                                            | 19-2019                          |

Ethik-Kommission des FB Medizin, Gießen  
Landesärztekammer Brandenburg

178/18  
AS 43(bB)/2020

**ITALY**

|                                                                                                                |                                      |
|----------------------------------------------------------------------------------------------------------------|--------------------------------------|
| Comitato Etico Centrale IRCCS Lazio                                                                            | Report 1 16-01-2018 - Study 62/17/FB |
| Comitato Etico Milano Area 3                                                                                   | 108-032018                           |
| Comitato Etico Milano Area 3                                                                                   | 107-032018                           |
| Comitato Etico dell'Insubria                                                                                   | 136 of 2018                          |
| Comitato Etico Milano Area 3                                                                                   | 247-052018                           |
| Comitato Etico Val Padana                                                                                      | 34514 of 15/10/2018                  |
| Comitato Etico di Bergamo                                                                                      | 125/18                               |
| Comitato Etico di Brescia                                                                                      | NP 3214                              |
| Comitato Etico Area Pavia                                                                                      | 20180028515                          |
| Comitato Etico Milano Area 1                                                                                   | 55895/2018                           |
| Comitato Etico Regionale Liguria                                                                               | 196/2018                             |
| Comitato Etico Regionale Liguria                                                                               | 196bis/2018                          |
| Comitato Etico Interaziendale                                                                                  | 438/CE                               |
| AOU Maggiore della Carità, ASL BI, ASL NO, ASL BCL                                                             |                                      |
| Comitato Etico Interaziendale                                                                                  | ASOOcul 18/01                        |
| Comitato Etico delle Sperimentazioni Cliniche<br>della Provincia di Vicenza                                    | 91/18                                |
| Comitato Etico Campania Sud - ASL Napoli 3 Sud                                                                 | 85_r.p.s.o. Prot/SCCE 102716         |
| Comitato Etico Università degli Studi della Campania<br>"Luigi Vanvitelli"                                     | 545 24/07/2018-Protocollo 13642/18   |
| Comitato Etico Palermo 1                                                                                       | 43282                                |
| Comitato Etico Catania 2                                                                                       | Prot 533/CE                          |
| Comitato Etico Catania 1                                                                                       | 124/2018/PO                          |
| Comitato Etico Palermo 2                                                                                       | 145 AG 2018                          |
| Comitato Etico Regionale delle Sperimentazioni Cliniche della Regione Toscana-Sezione area<br>Vasta Centro     | 13410_oss                            |
| Comitato Etico Regionale delle Sperimentazioni Cliniche della Regione Toscana-Sezione area<br>Vasta Nord Ovest | 36768                                |
| Comitato Etico Regionale delle Sperimentazioni Cliniche della Regione Toscana-Sezione area<br>Vasta Nord Ovest | 39781                                |
| Comitato Etico Indipendente Azienda Ospedaliero-Universitaria "Consortiale Policlinico"                        | 5615                                 |
| Comitato Etico Indipendente Azienda Ospedaliero-Universitaria "Consortiale Policlinico"                        | 5665                                 |
| Comitato Etico Lazio 1                                                                                         | 981/CE 1249                          |
| Comitato Etico dell'Università Sapienza                                                                        | 164 SA_2018-RIF CE 5079              |

Comitato Etico Lazio 2  
Comitato Etico delle Aziende Sanitarie dell'Umbria  
Comitato Etico Calabria  
sezione Area Centro  
Comitato Etico Indipendente Azienda Ospedaliero-Universitaria di Cagliari

69.18 A e B  
3293/18  
08 of 18/01/2018  
  
Prot PG/2018/11677

## **RUSSIA**

Independent Interdisciplinary Committee on Ethical Review of Clinical Trials

Extract from protocol №18 of the meeting of Independent Interdisciplinary Committee on Ethical Review of Clinical Trials dated Nov 10, 2017 (approval of the whole study)

Moscow City Independent Ethics Committee

Extract from protocol №15 of Moscow City Independent Ethics Committee ethical review dated Feb 21, 2018 (City Clinical Hospital №67 named after Vorokhobova L.A.)

Ethics Committee of State Novosibirsk Regional Clinical Hospital

Extract from protocol №2 of the meeting of Ethic Committee of State Novosibirsk Regional Clinical Hospital dated May 11, 2018 (State Novosibirsk Regional Clinical Hospital)

Independent Review Board of Kazan Regional Ophthalmological Hospital

Extract from protocol №2 of the meeting of Independent Review Board of Kazan Regional Ophthalmological Hospital dated Mar 11, 2019 (Kazan Regional Ophthalmological Hospital)

## **KUWAIT**

National MOH approval, Kuwait

1426

## **EGYPT**

National MOH approval, Cairo

IORG0005704/IRB0000687

## **LEBANON**

Hotel Dieu de France "BESH and Eye and Ear Hospital", Lebanon  
HLG/Dr. Raja Chaftari, Lebanon  
AUBMC/Abeer Dakik/Hamra, Lebanon

No reference number  
2019-IRB-022  
19157/BIO-2018-0196

## **UNITED ARAB EMIRATES**

MediClinic Airport/Khan Zakallah/Dubai Production City, Public Pavillion, Dubai  
SKMC/Jaishen Rajah/Sheikh Khalifa Medical City, Abu Dhabi  
Moorfields Eye Hospital DHCC  
Dubai health authority "Medcare and Dubai Hospitals", Dubai

MCME.CR.52.MAIR.2018  
REC-8.11.2018 [RS-551]  
REC/2019/P04  
Medcare\_DSREC-11/2018\_07 /Dubai\_DSREC-08/2020\_34

Ministry of Health and Prevention "Al Qassimi Hospital", Dubai  
Tawam Hospital, Abu Dhabi  
Maghrabi DHCC, Dubai  
Moorfields Abu Dhabi AUH, Abu Dhabi

MOHAP/DXB-REC-23/J.JA/2019  
AA/SS/675  
No reference number  
REC/2019/P04

---



## Appendix II: COMETA (Costs and Outcomes of ReTInAI Disease) questionnaire

- 1) How are you completing the questionnaire?
  - a) By myself, no assistance required
  - b) With assistance from family, partner, friend
  - c) With assistance from health-care professional
  
- 2) What describes best your living environment?
  - a) I am living alone
  - b) I am living with family, spouse, partner, friend
  - c) I am living in institutional care
  
- 3) What describes best your current activity?
  - a) Full-time, self-employed
  - b) Part-time
  - c) Unemployed due to vision loss
  - d) Unemployed
  - e) Home maker
  - f) Retired early due to vision loss
  - g) Retired
  - h) Employed, not further specified
  - i) Other
  
- 4) In the past 3 months, did you have to take days of sick leave?
  - a) No
  - b) Yes  
Number of days of sick leave \_\_\_\_\_
  
- 5) In the past 3 months, did you have to reduce working hours permanently?
  - a) No
  - b) Yes  
Number of weekly working hours permanently reduced \_\_\_\_\_
  
- 6) In the past 3 months, did you have to change your type of work?
  - a) No
  - b) Yes
  
- 7) In the past 3 months, did you spend time in hospital because of vision impairment?
  - a) No
  - b) Yes  
Days spent in inpatient stay \_\_\_\_\_  
Days spent with a day visit or treatment \_\_\_\_\_  
Days spent at emergency unit \_\_\_\_\_  
Days spent in a specialized centre \_\_\_\_\_
  
- 8a) In the past 3 months, did you experience a fall/accident because of vision impairment?
  - a) No
  - b) Yes
  
- 8b) Did you receive treatment for your fall/accident?

- a) No
- b) Yes

8c) For your fall/accident, were you treated

- a) At hospital
- b) Ambulatory care

Days spent in inpatient stay \_\_\_\_\_

Days spent with a day visit or treatment \_\_\_\_\_

Days spent at Emergency unit \_\_\_\_\_

Days spent in a specialized centre \_\_\_\_\_

9) Number of visits to ophthalmologist / retinal specialist in the past 3 months \_\_\_\_\_

Duration:

- a) Up to 1 hour
- b) 2–3 hours
- c) Half a day
- d) More

10) Number of visits to general practitioner / family doctor in the past 3 months \_\_\_\_\_

Duration:

- a) Up to 1 hour
- b) 2–3 hours
- c) Half a day
- d) More

11) Number of visits to other medical specialist in the past 3 months \_\_\_\_\_

Duration:

- a) Up to 1 hour
- b) 2–3 hours
- c) Half a day
- d) More

12) Number of visits to orthoptist (vision specialist) in the past 3 months \_\_\_\_\_

Duration:

- a) Up to 1 hour
- b) 2–3 hours
- c) Half a day
- d) More

13) Number of visits to nurse in the past 3 months \_\_\_\_\_

Duration:

- a) Up to 1 hour
- b) 2–3 hours
- c) Half a day
- d) More

14) Number of visits to psychologist/counsellor in the past 3 months \_\_\_\_\_

Duration:

- a) Up to 1 hour
- b) 2–3 hours

- c) Half a day
- d) More

15) In the past 3 months, did you have to make changes to your living situation because of your vision loss?

- a) No
- b) Yes

16) Did you pay out of your own pocket?

- a) No, fully reimbursed
- b) Yes, but partly reimbursed
- c) Yes

17) Number of days needing transportation in the past 3 months \_\_\_\_\_

Duration:

- a) Up to 1 hour
- b) 2–3 hours
- c) Half a day
- d) More

18) Number of days needing home help (household tasks) in the past 3 months \_\_\_\_\_

Duration:

- a) Up to 1 hour
- b) 2–3 hours
- c) Half a day
- d) More

19) Number of days needing social aid in the past 3 months \_\_\_\_\_

Duration:

- a) Up to 1 hour
- b) 2–3 hours
- c) Half a day
- d) More

20) Number of days needing nurse support in the past 3 months \_\_\_\_\_

Duration:

- a) Up to 1 hour
- b) 2–3 hours
- c) Half a day
- d) More

21) Number of days needing meals delivery in the past 3 months \_\_\_\_\_

Duration:

- a) Up to 1 hour
- b) 2–3 hours
- c) Half a day
- d) More

22) Number of days needing laundry service in the past 3 months \_\_\_\_\_

Duration:

- a) Up to 1 hour
- b) 2–3 hours

- c) Half a day
- d) More

23) Which aids have you used in the past 3 months because of poor vision?

- a) Eye glasses
- b) Stand/lamp magnifier
- c) Speech synthesizer
- d) Special diabetes device
- e) TV glasses
- f) Video magnifier
- g) Computer within an integrated auditory system
- h) Walking aids
- i) Contact lenses
- j) Telescopic lenses
- k) Special phone
- l) Enlarger screen
- m) Hand-held magnifier
- n) Medication dispenser

25a) Did you require assistance from your family or friends because of your vision problems in the past 3 months?

- a) No
- b) Yes

25b) Type of assistance needed

- a) Basic self-care activities (hours per week \_\_\_\_\_)
- b) Instrumental activities (hours per week \_\_\_\_\_)
- c) Mobility help, transportation (hours per week \_\_\_\_\_)
- d) Help with medication (hours per week \_\_\_\_\_)
- e) Handling administrative tasks (hours per week \_\_\_\_\_)
- f) Keeping company, spending time together (hours per week \_\_\_\_\_)

25c) Who was the caregiver who provided this assistance?

- a) Spouse/partner
  - Not working
  - Working
- b) Family member
  - Not working
  - Working
- c) Friend/neighbour
  - Not working
  - Working

25d) Did your caregiver reduce/give up work?

- a) No
- b) Yes, reduced work hours
- c) Yes, gave up work

### Appendix III: AURIGA lead study investigators

| Site ID    | Study country | Lead study investigator       |
|------------|---------------|-------------------------------|
| 1915710002 | Germany       | Matthias Hartmann             |
| 1915710003 | Germany       | Erik Beeke                    |
| 1915710004 | Germany       | Hendrik Fuchs                 |
| 1915710005 | Germany       | Stephan Dunker                |
| 1915710006 | Germany       | Dirk Sander                   |
| 1915710007 | Germany       | Tobias Duncker                |
| 1915710008 | Germany       | Hakan Kaymak                  |
| 1915710010 | Germany       | Claudia Schuart               |
| 1915710011 | Germany       | Hüsnu Berk                    |
| 1915710013 | Germany       | Bernd Kampeter                |
| 1915710015 | Germany       | Ulrich Thelen                 |
| 1915710016 | Germany       | Hans-Werner Görges            |
| 1915710017 | Germany       | Mirjam Gross                  |
| 1915710018 | Germany       | Helmut Sachs                  |
| 1915710019 | Germany       | Berthold Seitz                |
| 1915710020 | Germany       | Mohammad Osman Ramez          |
| 1915710021 | Germany       | Martin Scheffler              |
| 1915710022 | Germany       | Marianne Liedtke-Maier        |
| 1915710023 | Germany       | Peter Wiedemann               |
| 1915710023 | Germany       | Matus Rehak                   |
| 1915710024 | Germany       | Matthias Grüb                 |
| 1915710025 | Germany       | Andrea Michaela Wißmann       |
| 1915710026 | Germany       | Laszlo Kiraly                 |
| 1915710027 | Germany       | Frank Röschinger              |
| 1915710028 | Germany       | Christian Karl Brinkmann      |
| 1915710030 | Germany       | Darius Schwarz                |
| 1915710030 | Germany       | Mohamed Khaireddine Ben Hafsa |
| 1915710032 | Germany       | Thomas Kube                   |
| 1915710033 | Germany       | Hita Dave                     |
| 1915710035 | Germany       | Salvatore Grisanti            |
| 1915710042 | Germany       | Jakub Chmielowski             |
| 1915710043 | Germany       | Reka Seitz                    |
| 1915710046 | Germany       | Fanni Molnar                  |
| 1915710047 | Germany       | Simo Murovski                 |
| 1915710048 | Germany       | Stefan Martin Heinrich        |
| 1915710050 | Germany       | Christian Ksinsik             |
| 1915710051 | Germany       | Rainer Guthoff                |
| 1915710055 | Germany       | Patrick Dillinger             |
| 1915710056 | Germany       | Katrin Lorenz                 |
| 1915710058 | Germany       | Tim Hendrik Wirt              |
| 1915716001 | France        | Agnès Glacet-Bernard          |
| 1915716003 | France        | Céline Faure                  |
| 1915716004 | France        | Christian Delhay              |
| 1915716005 | France        | Jérémie Halfon                |
| 1915716006 | France        | Camille Philippe-Zech         |

|            |        |                             |
|------------|--------|-----------------------------|
| 1915716007 | France | Thi Ha Chau Tran            |
| 1915716009 | France | Sébastien Guigou            |
| 1915716010 | France | Mounir Benzerroug           |
| 1915716011 | France | Jean-François Girmens       |
| 1915716012 | France | Benjamin Wolff              |
| 1915716013 | France | Christophe Baeteman         |
| 1915716014 | France | Anne Robinet                |
| 1915716015 | France | Minh-Huyen Nghiem-Buffer    |
| 1915716016 | France | Rémi Servantie              |
| 1915716017 | France | Frank Becquet               |
| 1915716018 | France | Laurence Mahieu-Durringer   |
| 1915716019 | France | Mate Streho                 |
| 1915716023 | France | Joël Uzzan                  |
| 1915716024 | France | Laurent Velasque            |
| 1915716025 | France | Alban Comet                 |
| 1915716026 | France | Stéphanie Baillif           |
| 1915716028 | France | Jean-Baptiste Conart        |
| 1915716029 | France | Catherine Creuzot-Garcher   |
| 1915716030 | France | Stéphane Delage             |
| 1915716031 | France | Laurent Kodjikian           |
| 1915716033 | France | Nicolas Levezuel            |
| 1915716034 | France | Martine Mauget-Faÿsse       |
| 1915716035 | France | Nicolas Nabholz             |
| 1915716036 | France | Boris Rysanek               |
| 1915716037 | France | Philippe Schauer            |
| 1915716038 | France | Sarah Ayello-Scheer         |
| 1915716039 | France | Eric SOUIED                 |
| 1915716040 | France | Ramin Tadayoni              |
| 1915716041 | France | Hassiba Oubraham-Mebroukine |
| 1915716042 | France | Audrey Giocanti-Auregan     |
| 1915716043 | France | Olivier Jankowski           |
| 1915716044 | France | Édouard Koch                |
| 1915716045 | France | Bernard Joannot             |
| 1915716046 | France | Vincent Parier              |
| 1915716047 | France | Jean-Claude Quintyn         |
| 1915716049 | France | Adil Darugar                |
| <hr/>      |        |                             |
| 1915722001 | Italy  | Monica Varano               |
| 1915722002 | Italy  | Laura Sabato                |
| 1915722004 | Italy  | Simone Donati               |
| 1915722005 | Italy  | Stefano Gambaro             |
| 1915722006 | Italy  | Fabrizio Magnani            |
| 1915722007 | Italy  | Anna Paola Salvetti         |
| 1915722009 | Italy  | Luciano Quaranta            |
| 1915722012 | Italy  | Tommaso Rossi               |
| 1915722013 | Italy  | Massimo Nicolò              |
| 1915722014 | Italy  | Stela Vujosevic             |
| 1915722014 | Italy  | Stefano De Cilla            |
| 1915722015 | Italy  | Andrea Coggiola             |

|            |        |                           |
|------------|--------|---------------------------|
| 1915722019 | Italy  | Simonetta Morselli        |
| 1915722021 | Italy  | Alfredo Greco             |
| 1915722022 | Italy  | Francesca Simonelli       |
| 1915722023 | Italy  | Maria Vadalà              |
| 1915722024 | Italy  | Clara Marino              |
| 1915722025 | Italy  | Andrea Russo              |
| 1915722026 | Italy  | Charles Anthony Martorana |
| 1915722027 | Italy  | Gianni Virgili            |
| 1915722028 | Italy  | Franco Passani            |
| 1915722030 | Italy  | Marco Nardi               |
| 1915722031 | Italy  | Claudio Furino            |
| 1915722035 | Italy  | Gianluca Scuderi          |
| 1915722037 | Italy  | Mauro Schiavone           |
| 1915722038 | Italy  | Carlo Cagini              |
| 1915722039 | Italy  | Giovanna Carnovale Scalzo |
| 1915751001 | Russia | Sergey Grigorov           |
| 1915751002 | Russia | Ekaterina Zakharova       |
| 1915751004 | Russia | Zuleikha Abdulgazizova    |
| 1915751005 | Russia | Elena Krivolapova         |
| 1915751006 | Russia | Elina Santoro             |
| 1915751007 | Russia | Sergey Obikhod            |
| 1915751008 | Russia | Natalia Balalaeva         |
| 1915751009 | Russia | Irina Kovelonova          |
| 1915751010 | Russia | Olga Dobroradnykh         |
| 1915751011 | Russia | Andrey Yavorskiy          |
| 1915751012 | Russia | Andrey Goydin             |
| 1915751013 | Russia | Liya Ramazanova           |
| 1915751013 | Russia | Krisitina Protasova       |
| 1915751014 | Russia | Evgeny Chernov            |
| 1915751015 | Russia | Tatyana Kamenskih         |
| 1915751016 | Russia | Anzhella Fursova          |
| 1915751017 | Russia | Oleg Kolenko              |
| 1915751018 | Russia | Yana Martusevich          |
| 1915751019 | Russia | Alexander Doga            |
| 1915751020 | Russia | Alla Ryabtseva            |
| 1915751021 | Russia | Aliya Yarmukhametova      |
| 1915751022 | Russia | God'ko Nadezhda           |
| 1915751023 | Russia | Nikolay Logunov           |
| 1915751024 | Russia | Rosa Tokinova             |
| 1915751025 | Russia | Tatiana Sokolova          |
| 1915751026 | Russia | Svetlana Kim              |
| 1915751027 | Russia | Kseniya Dashenko          |
| 1915751028 | Russia | Aleksandr Kolesnikov      |
| 1915751029 | Russia | Tatiana Yurieva           |
| 1915751030 | Russia | Anastasia Shaidt          |
| 1915751031 | Russia | Elena Zhukova             |
| 1915751032 | Russia | Olga Parfentseva          |
| 1915754001 | China  | Fangju Han                |

|            |                      |                     |
|------------|----------------------|---------------------|
| 1915754002 | China                | Xianyong Sun        |
| 1915754003 | China                | Xun Xu              |
| 1915754004 | China                | Wei Gu              |
| 1915754005 | China                | Jingxiang Zhong     |
| 1915754006 | China                | Hongjie Ma          |
| 1915754007 | China                | Mei Han             |
| 1915754008 | China                | Qing Chang          |
| 1915754009 | China                | Xingrong Wang       |
| 1915754010 | China                | Zhaoxia Zhao        |
| 1915754010 | China                | Ke Fan              |
| 1915754011 | China                | Xiaoyi Yu           |
| 1915754012 | China                | Guoming Zhang       |
| 1915754013 | China                | Xiaorong Li         |
| 1915754014 | China                | Haifeng Xu          |
| 1915754015 | China                | Qiuming Li          |
| 1915754016 | China                | Haoyu Chen          |
| 1915754017 | China                | Bin Sun             |
| 1915754018 | China                | Suyan Li            |
| 1915754019 | China                | Hong Dai            |
| 1915754020 | China                | Youxin Chen         |
| 1915754021 | China                | Peiquan Zhao        |
| <hr/>      |                      |                     |
| 1915761001 | Taiwan               | Shih-Jen Chen       |
| 1915761002 | Taiwan               | Cheng-Kuo Cheng     |
| 1915761003 | Taiwan               | Shu-Chun Kuo        |
| 1915761005 | Taiwan               | Hsiang-Ling Tsai    |
| 1915761006 | Taiwan               | Jian-Sheng Wu       |
| 1915761007 | Taiwan               | Wen-Lu Chen         |
| 1915761008 | Taiwan               | Shwu-Jiuan Sheu     |
| 1915761009 | Taiwan               | Wen-Chuan Wu        |
| 1915761010 | Taiwan               | Sheng-Min Hsu       |
| 1915761011 | Taiwan               | Jiann-Torng Chen    |
| 1915761012 | Taiwan               | Ming-Shan He        |
| 1915761013 | Taiwan               | Chien-Liang Wu      |
| 1915761014 | Taiwan               | Jia-Kang Wang       |
| <hr/>      |                      |                     |
| 1915784001 | Egypt                | Noha Khater         |
| 1915784002 | Egypt                | Omar Barrada        |
| 1915784003 | Egypt                | Ahmed El-Sawy Habib |
| 1915784007 | Egypt                | Maged Mikhael       |
| 1915784008 | Egypt                | Amr Bessa           |
| 1915784011 | Egypt                | Magdy Moussa        |
| <hr/>      |                      |                     |
| 1915787001 | Saudi Arabia         | Marco Mura          |
| 1915787002 | Saudi Arabia         | Marwan Abouammoh    |
| 1915787003 | Saudi Arabia         | Selwa Al-Hazaa      |
| 1915787004 | Saudi Arabia         | Saad Waheeb         |
| 1915787005 | Saudi Arabia         | Mohammad Hazzazi    |
| <hr/>      |                      |                     |
| 1915795501 | Lebanon              | Riad Bijanny        |
| 1915795503 | Lebanon              | Alexander Jalkh     |
| <hr/>      |                      |                     |
| 1915795901 | United Arab Emirates | Usman Mahmood       |



|            |                      |                   |
|------------|----------------------|-------------------|
| 1915795902 | United Arab Emirates | Ahmed ElBarky     |
| 1915795903 | United Arab Emirates | Avinash Gurbaxani |
| 1915795904 | United Arab Emirates | Prasan Rao        |
| 1915795905 | United Arab Emirates | Patricio Lorenzo  |
| 1915795906 | United Arab Emirates | Fatima Al-Amiri   |
| 1915795907 | United Arab Emirates | Alaa Attawan      |
| 1915795908 | United Arab Emirates | Amr Farid         |
| 1915795909 | United Arab Emirates | Madhava Rao       |
| 1915795910 | United Arab Emirates | Firdaus Sukhi     |
| 1915795912 | United Arab Emirates | Igor Kozak        |

---
